# Supplementary material
Source: Springer Nature journal article supplement (https://www.springermedizin.de/resource/supplementary/12985_2012_2072_MOESM7_ESM.pdf/9606656)

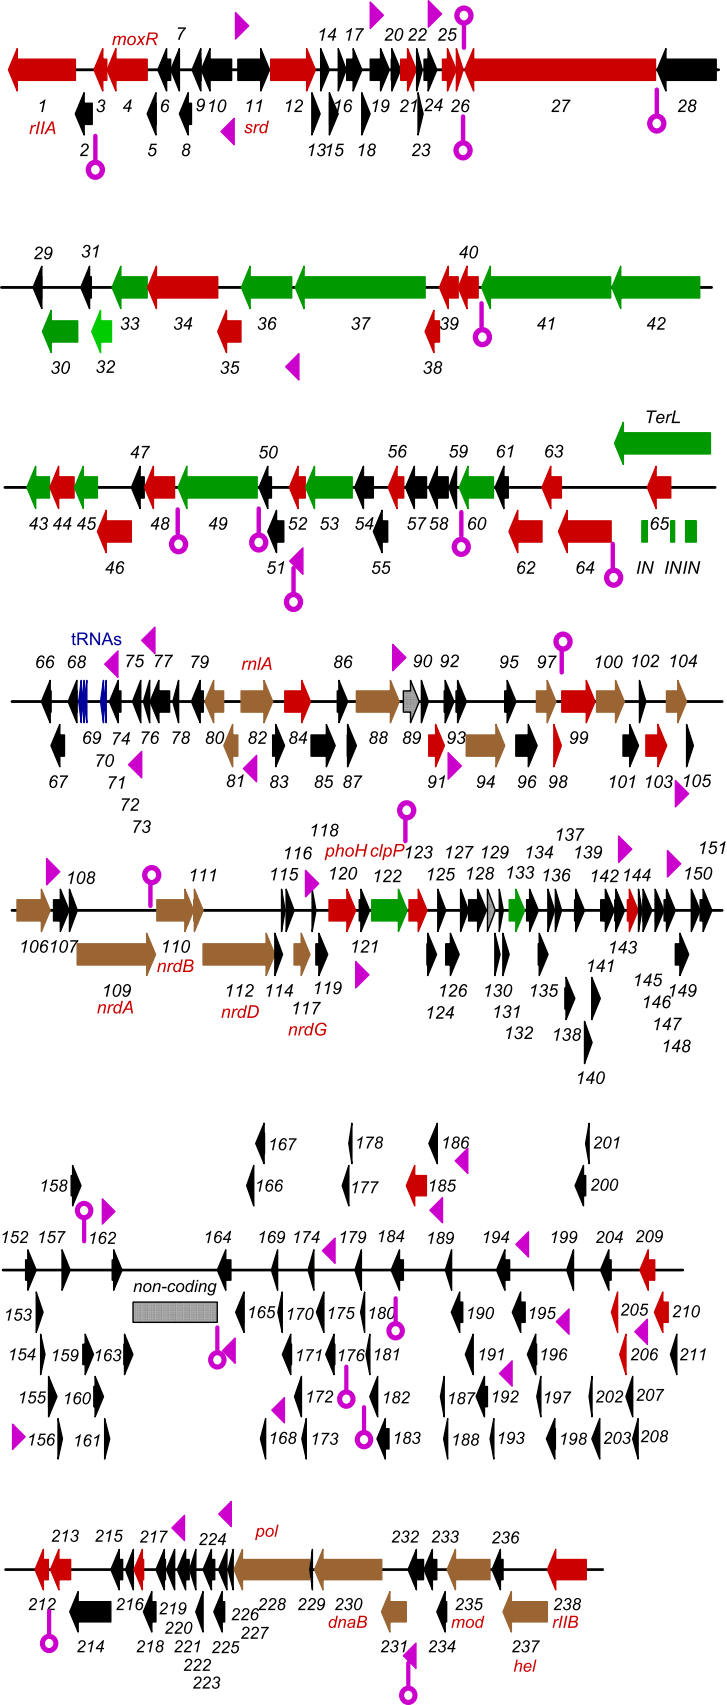

Supplement: MOESM7 [file 9606656]
